# Supplementary material
Source: Springer Nature journal article supplement (https://www.springermedizin.de/resource/supplementary/12913_2009_1116_MOESM1_ESM.pdf/9536400)

## Inpatient Palliative Care Consultations

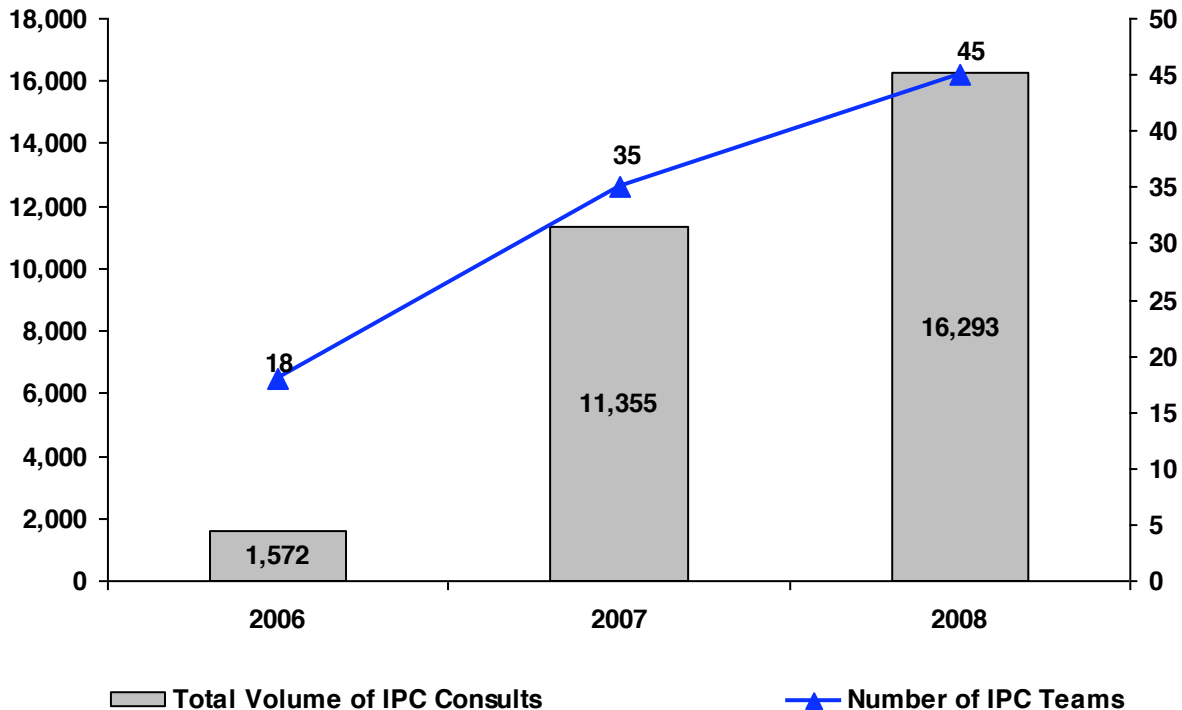

Supplement: MOESM1 [file 9536400]
